# Supplementary material for: Preparation of Carbon Dots@r-GO Nanocomposite with an Enhanced Pseudo-Capacitance
Source: MDPI journal article supplement (doi:10.3390/molecules28020541), 2023-01-05
Supplement: s1 [file s1]

# Supporting Information

## Preparation of carbon dots@r-GO nanocomposite with an enhanced pseudo-capacitance

Qichen Liu<sup>1</sup>, Kangkang Ge<sup>2</sup>, Xiaoyan Wu<sup>1</sup>, Zhiwei Zhu<sup>2</sup>, Yu Zhu<sup>2</sup>, Hong Bi<sup>1,\*</sup>

<sup>1</sup>School of Materials Science and Engineering, Anhui University, 111 Jiulong Road, Hefei 230601, China

<sup>2</sup>School of Chemistry and Chemical Engineering, Anhui University, 111 Jiulong Road, Hefei 230601, China

\*Correspondence: [bihong@ahu.edu.cn](mailto:bihong@ahu.edu.cn)

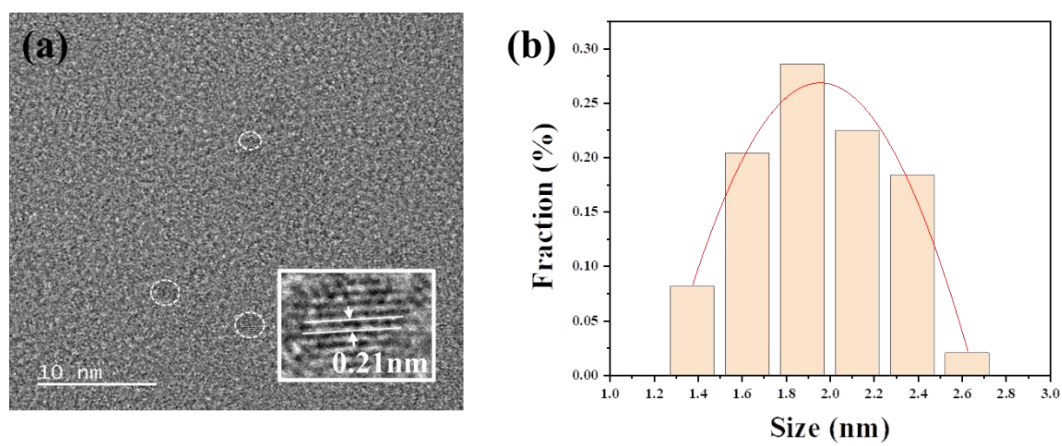

**Figure S1.** (a) High resolution TEM image and (b) the size distribution of CDs.

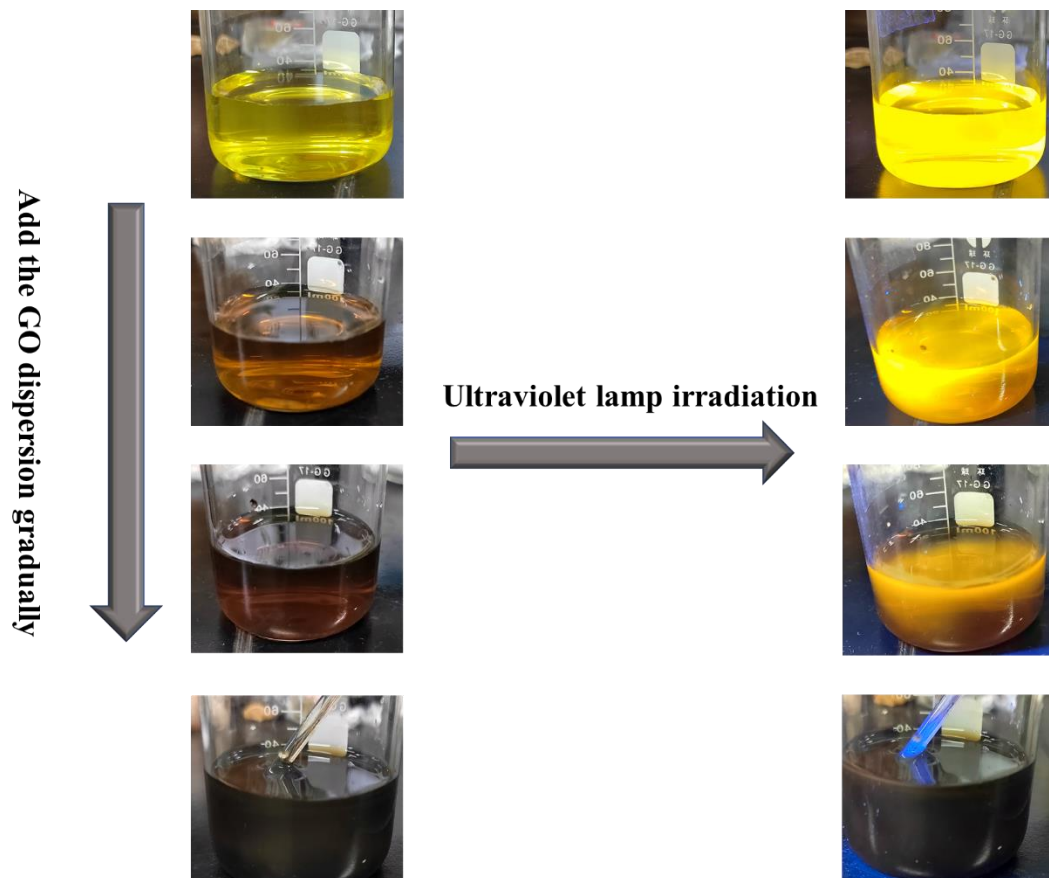

**Figure S2.** Photos of the solution containing the CDs under UV irradiation when gradually adding GO into the solution.

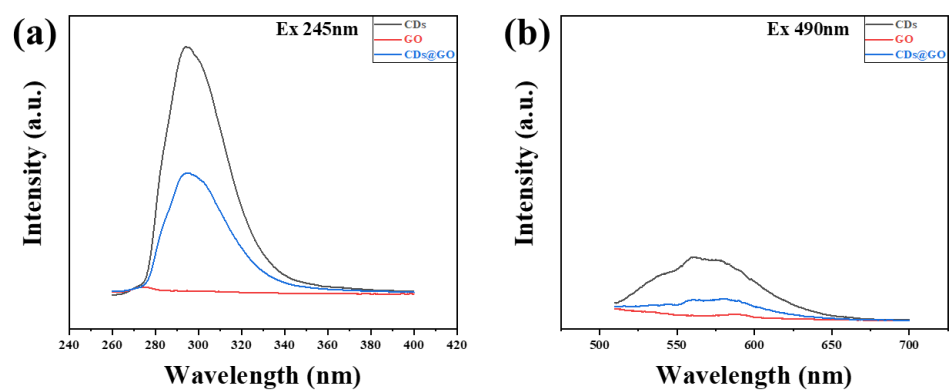

**Figure S3.** PL spectra of the CDs, GO and CDs@GO at the excitation wavelength of (a) 245 nm and (b) 490 nm.

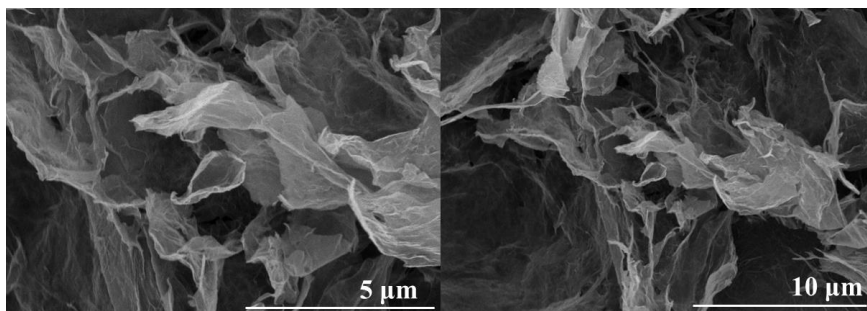

**Figure S4.** Scanning electron microscope (SEM) images of r-GO obtained by sodium ascorbate reduction method.

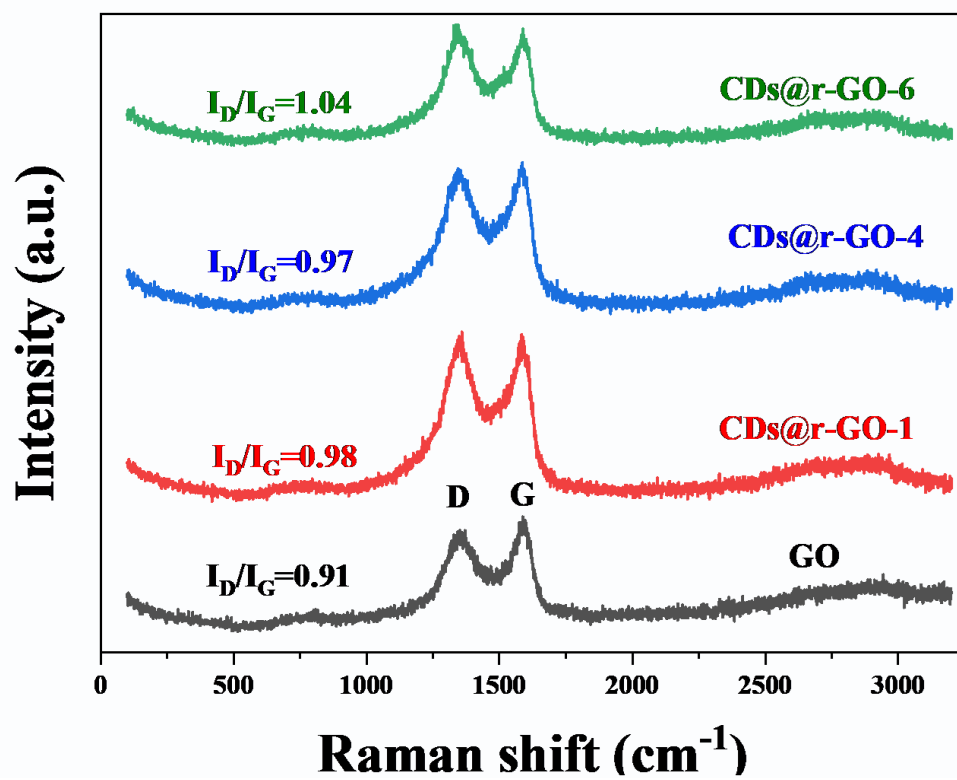

Figure S5. The Raman spectra of GO, CDs@r-GO-1, CDs@r-GO-4 and CDs@r-GO-6.

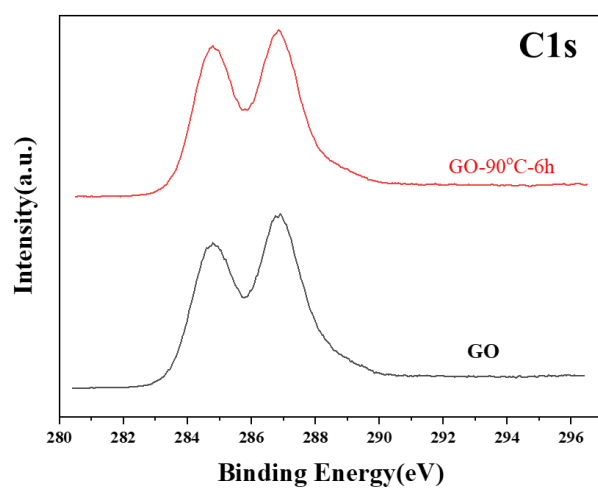

**Figure S6.** XPS C1s spectra of the GO and GO-90°C-6h.

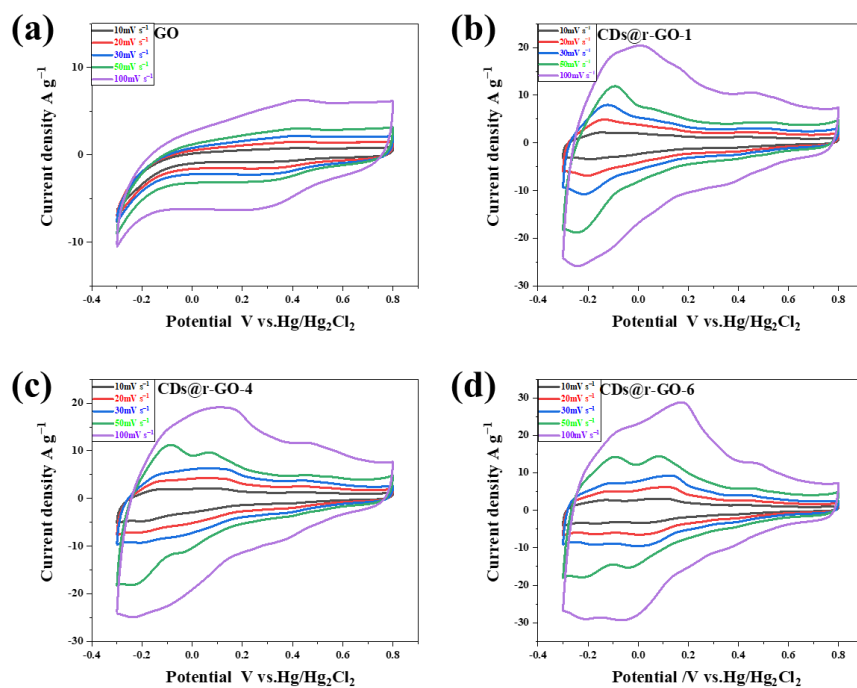

**Figure S7.** Cyclic voltammetry curves of (a) r-GO, (b) CDs@r-GO-1, (c) CDs@r-GO-4 and (d) CDs@r-GO-6 in 1 M H<sub>2</sub>SO<sub>4</sub> electrolyte with scan rates ranging from 10 to 100 mV s<sup>-1</sup>.



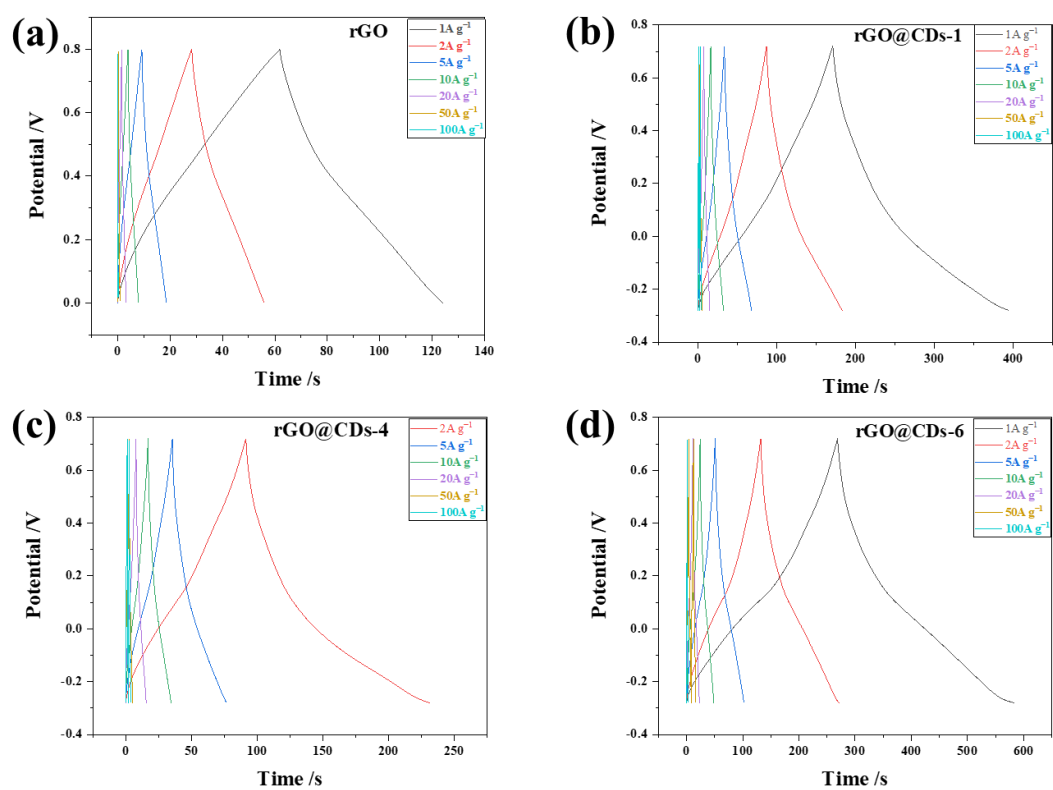

**Figure S8.** Constant current charge and discharge curve of (a) r-GO, (b) CDs@r-GO-1, (c) CDs@r-GO-4, and (d) CDs@r-GO-6 at current density of 1-100A g<sup>-1</sup>.

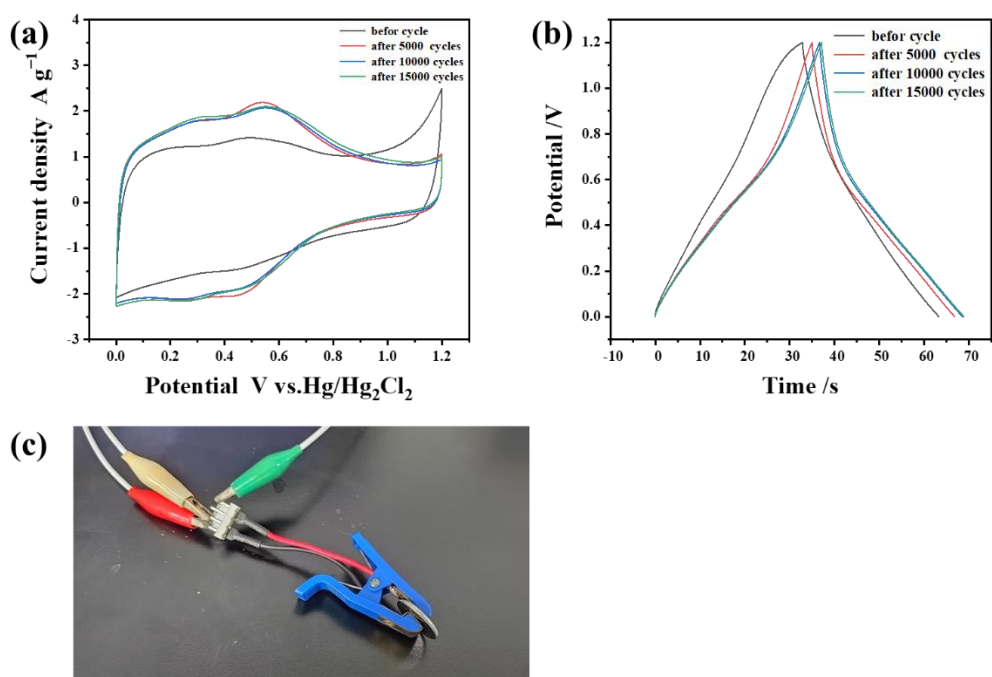

**Figure S9.** (a) Cyclic voltammetry curve of the device at a scan rate of  $50 \text{ mV s}^{-1}$ . (b) Constant current charge and discharge curve of the device at current density of  $1 \text{ A g}^{-1}$ . (c) The photo of the device fabricated.

**Table S1.** Elemental contents obtained by XPS test

| Samples    | C (wt.%) | O (wt.%) | N (wt.%) |
|------------|----------|----------|----------|
| GO         | 72.3     | 24.4     | 2.6      |
| GO-90°C-6h | 72.9     | 23.6     | 3.5      |
| CDs        | 46.0     | 29.5     | 14.5     |

**Table S2.** Comparison with data of electrode materials in the literature

| Electrode material                                                         | Electrolyte                            | Current density<br>(A/g) | Specific capacitance<br>(F/g) | Rate capability        |
|----------------------------------------------------------------------------|----------------------------------------|--------------------------|-------------------------------|------------------------|
| 3D-graphene hydrogel                                                       | 1M H <sub>2</sub> SO <sub>4</sub>      | 1.0                      | 186.0                         | (1-20 A/g)<br>70%      |
| Graphene hydrogel                                                          | 1M Na <sub>2</sub> SO <sub>4</sub>     | 1.0                      | 157.7                         | (1-10 A/g)<br>58.3%    |
| AAQ (2-Aminoanthraquinone) modified SGH (self-assembled graphene hydrogel) | 1M H <sub>2</sub> SO <sub>4</sub>      | 0.3                      | 258.0                         | (0.3-90 A/g)<br>58.13% |
| Nitrogen and fluorine co-doped holey graphene hydrogel                     | 6M KOH                                 | 1.0                      | 345.4                         | (1-100 A/g)<br>57.29%  |
| Reduced graphene hydrogel                                                  | 6M KOH                                 | 0.5                      | 203.9                         | (1-100 A/g)<br>59.38%  |
| Reduced graphene oxide hydrogel/Carbon dots                                | 1M H <sub>2</sub> SO <sub>4</sub> -PVA | 1.0                      | 264.0                         | (1-10 A/g)<br>79.54%   |
| Reduced graphene oxide/Carbon dots                                         | 1M H <sub>2</sub> SO <sub>4</sub>      | 0.2                      | 278.0/227.0                   | (0.2-100 A/g)<br>60%   |
| N-andS-codoped graphene hydrogel                                           | 6M KOH                                 | 1.0                      | 320.0                         | (1-10 A/g)<br>68.75%   |
| Graphene hydrogel-graphene quantum dots                                    | 1M H <sub>2</sub> SO <sub>4</sub>      | 0.5                      | 451.7                         | (1-20 A/g)<br>59.86%   |
| Graphene quantum dots-3D graphene                                          | 1M KOH                                 | 1.17                     | 242.0                         | (1-25 A/g)<br>26.8%    |
| N,O co-doped CDs-graphene hydrogel                                         | 1M H <sub>2</sub> SO <sub>4</sub>      | 1.0                      | 335.1                         | (1-20 A/g)<br>67.16%   |

|                                                                         |                                   |     |       |                       |
|-------------------------------------------------------------------------|-----------------------------------|-----|-------|-----------------------|
| g-C <sub>3</sub> N <sub>4</sub> /graphene<br>hydrogel<br>nanocomposites | 1M KOH-<br>PVA                    | 0.2 | 243.2 | None                  |
| <b>This work</b>                                                        | 1M H <sub>2</sub> SO <sub>4</sub> | 1.0 | 290.0 | (1-100 A/g)<br>78.94% |

---
